# Supplementary material for: Transcallosal connectivity of the human cortical motor network
Source: Springer Nature journal article supplement (doi:10.1007/s00429-016-1274-1), 2016-07-28
Supplement: MOESM4 [file 10538514]

## **Title: Transcallosal connectivity of the human cortical motor network**

**Authors:** Kathy L. Ruddy<sup>1,2,3\*</sup>, Alexander Leemans<sup>4</sup>, Richard G. Carson<sup>1,2</sup>

### **Supplementary Materials**

#### **Supplementary Figure and Movie captions:**

**Supplementary Figure 1- Balloon plot illustrating FA values obtained for interhemispheric fibre bundles.** The “greater than” symbol indicates that the connections represented by the larger (coloured) circle exhibit median FA values that are greater than those represented by all successive smaller (coloured) circles. The corresponding inferential analyses are reported in Supplementary Table 3 for pairwise comparisons of tracts connecting homologous regions and in Supplementary Table 6 for non-homologous comparisons.

**Supplementary Movie 1:** Tracts reconstructed using DTI based tractography, for PMd-PMd homologous connections for one representative subject. Tracts are displayed on the individual’s T1 structural image.

**Supplementary Movie 2:** Tracts reconstructed using CSD based tractography, for PMd-PMd homologous connections for one representative subject. Tracts are displayed on the individual’s T1 structural image.

**Supplementary Table 1.** Median values for DWI derived indices of structural connectivity.

Data are presented separately for counts of normalized reconstructed streamlines, fractional anisotropy (FA) and apparent fibre density (AFD) in fibre tracts connecting each node of the cortical motor network in the left (L) hemisphere to the corresponding nodes in the right (R) hemisphere. 95% confidence intervals generated using bootstrapping are displayed below each value. The symbol X denotes instances in which no tracts were detected (i.e. in any participant). In some other cases the estimates of AFD and FA are based upon fibre bundles wherein only a small number of streamlines were reconstructed, or upon streamlines that were reconstructed for a subset of participants, thus no confidence intervals could be computed.

| <b>Normalised Number of Streamlines</b> |                    |                  |                |                 |               |                 |               |                 |
|-----------------------------------------|--------------------|------------------|----------------|-----------------|---------------|-----------------|---------------|-----------------|
|                                         | <b>R SMAproper</b> | <b>R pre-SMA</b> | <b>R CMA</b>   | <b>R M1a</b>    | <b>R M1p</b>  | <b>R PMd</b>    | <b>R PMv</b>  | <b>R S1</b>     |
| <b>L SMA proper</b>                     | 18.85              | 7.65             | 4.33           | 0.12            | X             | 5.98            | 2.23          | 0.10            |
|                                         | (16.06 - 20.05)    | (5.30 - 9.92)    | (2.63 - 5.44)  | (0.10 - 0.21)   | NA            | (4.72 - 6.49)   | (1.23 - 3.03) | (0.04 - 0.13)   |
| <b>L pre-SMA</b>                        | 3.56               | 16.36            | 3.85           | 0.05            | X             | 2.57            | 1.20          | 0.04            |
|                                         | (2.60 - 4.32)      | (13.53 - 17.82)  | (2.02 - 4.47)  | NA              | NA            | (1.94 - 3.21)   | (0.77 - 1.81) | (0.043 - 0.044) |
| <b>L CMA</b>                            | 3.71               | 3.17             | 14.70          | 1.89            | 0.36          | 1.84            | 1.17          | 0.48            |
|                                         | (2.42 - 4.63)      | (2.02 - 3.78)    | (12.5 - 15.83) | (1.34 - 2.89)   | (0.07 - 0.51) | (1.29 - 2.34)   | (0.65 - 1.60) | (0.30 - 0.83)   |
| <b>L M1a</b>                            | 0.19               | 0.07             | 2.85           | 14.69           | 0.54          | 3.70            | 0.21          | 4.39            |
|                                         | (0.10 - 0.45)      | (0.05 - 0.17)    | (1.84 - 3.60)  | (13.65 - 15.56) | (0.41 - 1.13) | (2.79 - 4.04)   | (0.09 - 0.27) | (3.53 - 6.02)   |
| <b>L M1p</b>                            | 0.13               | X                | X              | 0.33            | 0.96          | 0.38            | 1.19          | 0.18            |
|                                         | NA                 | NA               | NA             | (0.12 - 0.94)   | (0.59 - 2.05) | (0.22 - 0.59)   | (0.53 - 2.01) | (0.09 - 0.60)   |
| <b>L PMd</b>                            | 5.49               | 4.90             | 2.32           | 3.27            | 0.18          | 18.19           | 0.88          | 0.32            |
|                                         | (4.76 - 5.81)      | (3.85 - 5.40)    | (1.81 - 2.54)  | (2.38 - 3.96)   | (0.04 - 0.52) | (15.94 - 20.68) | (0.56 - 1.08) | (0.18 - 0.58)   |
| <b>L PMv</b>                            | 2.30               | 1.19             | 1.04           | 0.27            | 0.85          | 1.35            | 2.19          | 0.24            |
|                                         | (1.55 - 3.12)      | (0.70 - 1.65)    | (0.66 - 1.49)  | (0.06 - 0.74)   | (0.08 - 0.98) | (0.75 - 1.59)   | (1.00 - 3.31) | (0.07 - 0.55)   |
| <b>L S1</b>                             | X                  | 0.34             | X              | 1.17            | 0.49          | 0.48            | 0.17          | 1.58            |
|                                         | NA                 | NA               | NA             | (0.57 - 1.77)   | (0.26 - 1.40) | (0.27 - 0.62)   | (0.07 - 0.34) | (0.75 - 2.27)   |
| <b>Fractional anisotropy</b>            |                    |                  |                |                 |               |                 |               |                 |
|                                         | <b>R SMAproper</b> | <b>R pre-SMA</b> | <b>R CMA</b>   | <b>R M1a</b>    | <b>R M1p</b>  | <b>R PMd</b>    | <b>R PMv</b>  | <b>R S1</b>     |
| <b>L SMA</b>                            | 0.48               | 0.48             | 0.40           | 0.46            | X             | 0.51            | 0.42          | 0.30            |

|                  |               |               |               |               |               |               |               |               |
|------------------|---------------|---------------|---------------|---------------|---------------|---------------|---------------|---------------|
| <b>proper</b>    | (0.47 - 0.49) | (0.47 - 0.50) | (0.39 - 0.41) | (0.30 - 0.49) | NA            | (0.49 - 0.52) | (0.40 - 0.44) | (0.25 - 0.32) |
| <b>L pre-SMA</b> | 0.46          | 0.47          | 0.40          | 0.26          | X             | 0.51          | 0.40          | 0.36          |
|                  | (0.44 - 0.48) | (0.46 - 0.48) | (0.37 - 0.40) | NA            | NA            | (0.50 - 0.52) | (0.38 - 0.43) | (0.25 - 0.36) |
| <b>L CMA</b>     | 0.39          | 0.39          | 0.37          | 0.39          | 0.41          | 0.42          | 0.35          | 0.39          |
|                  | (0.38 - 0.41) | (0.36 - 0.40) | (0.35 - 0.37) | (0.38 - 0.40) | (0.35 - 0.44) | (0.40 - 0.43) | (0.33 - 0.38) | (0.39 - 0.40) |
| <b>L M1a</b>     | 0.46          | 0.42          | 0.39          | 0.47          | 0.44          | 0.50          | 0.33          | 0.46          |
|                  | (0.38 - 0.49) | (0.34 - 0.43) | (0.38 - 0.40) | (0.46 - 0.48) | (0.42 - 0.46) | (0.48 - 0.50) | (0.31 - 0.37) | (0.44 - 0.46) |
| <b>L M1p</b>     | 0.41          | X             | X             | 0.36          | 0.33          | 0.34          | 0.30          | 0.35          |
|                  | NA            | NA            | NA            | (0.34 - 0.42) | (0.30 - 0.35) | (0.32 - 0.36) | (0.27 - 0.31) | (0.30 - 0.39) |
| <b>L PMd</b>     | 0.51          | 0.51          | 0.42          | 0.49          | 0.37          | 0.49          | 0.40          | 0.43          |
|                  | (0.50 - 0.51) | (0.50 - 0.52) | (0.41 - 0.42) | (0.48 - 0.50) | (0.35 - 0.40) | (0.49 - 0.51) | (0.39 - 0.42) | (0.40 - 0.48) |
| <b>L PMv</b>     | 0.43          | 0.41          | 0.38          | 0.34          | 0.31          | 0.39          | 0.35          | 0.31          |
|                  | (0.41 - 0.44) | (0.39 - 0.44) | (0.35 - 0.39) | (0.29 - 0.35) | (0.22 - 0.33) | (0.37 - 0.41) | (0.33 - 0.38) | (0.25 - 0.32) |
| <b>L S1</b>      | X             | 0.50          | X             | 0.45          | 0.33          | 0.38          | 0.30          | 0.42          |
|                  | NA            | NA            | NA            | (0.42 - 0.47) | (0.29 - 0.39) | (0.35 - 0.41) | (0.27 - 0.31) | (0.39 - 0.45) |

### Apparent Fibre Density

|                     | <b>R SMAproper</b> | <b>R pre-SMA</b> | <b>R CMA</b>  | <b>R M1a</b>  | <b>R M1p</b>  | <b>R PMd</b>  | <b>R PMv</b>  | <b>R S1</b>   |
|---------------------|--------------------|------------------|---------------|---------------|---------------|---------------|---------------|---------------|
| <b>L SMA proper</b> | 0.82               | 0.81             | 0.68          | 0.82          | X             | 0.86          | 0.71          | 0.41          |
|                     | (0.79 - 0.83)      | (0.78 - 0.83)    | (0.66 - 0.70) | (0.58 - 0.88) | NA            | (0.84 - 0.87) | (0.66 - 0.75) | (0.35 - 0.42) |
| <b>L pre-SMA</b>    | 0.77               | 0.77             | 0.65          | 0.47          | X             | 0.84          | 0.65          | 0.56          |
|                     | (0.74 - 0.79)      | (0.76 - 0.79)    | (0.60 - 0.67) | NA            | NA            | (0.81 - 0.87) | (0.59 - 0.69) | (0.42 - 0.56) |
| <b>L CMA</b>        | 0.67               | 0.62             | 0.58          | 0.65          | 0.70          | 0.70          | 0.56          | 0.64          |
|                     | (0.61 - 0.69)      | (0.59 - 0.64)    | (0.55 - 0.60) | (0.62 - 0.72) | (0.58 - 0.76) | (0.67 - 0.71) | (0.54 - 0.61) | (0.62 - 0.68) |
| <b>L M1a</b>        | 0.77               | 0.67             | 0.68          | 0.85          | 0.78          | 0.90          | 0.56          | 0.81          |
|                     | (0.81 - 0.86)      | (0.39 - 0.72)    | (0.63 - 0.69) | (0.81 - 0.86) | (0.72 - 0.84) | (0.87 - 0.93) | (0.45 - 0.61) | (0.77 - 0.82) |
| <b>L M1p</b>        | 0.72               | X                | X             | 0.57          | 0.52          | 0.56          | 0.50          | 0.59          |
|                     | NA                 | NA               | NA            | (0.50 - 0.74) | (0.43 - 0.55) | (0.54 - 0.58) | (0.44 - 0.52) | (0.45 - 0.63) |
| <b>L PMd</b>        | 0.86               | 0.85             | 0.71          | 0.90          | 0.61          | 0.86          | 0.67          | 0.76          |
|                     | (0.84 - 0.88)      | (0.82 - 0.86)    | (0.69 - 0.74) | (0.88 - 0.92) | (0.56 - 0.68) | (0.85 - 0.88) | (0.65 - 0.70) | (0.70 - 0.84) |
| <b>L PMv</b>        | 0.72               | 0.70             | 0.60          | 0.57          | 0.52          | 0.65          | 0.58          | 0.53          |
|                     | (0.68 - 0.74)      | (0.63 - 0.72)    | (0.56 - 0.63) | (0.48 - 0.58) | (0.33 - 0.54) | (0.62 - 0.69) | (0.56 - 0.60) | (0.37 - 0.58) |
| <b>L S1</b>         | X                  | 0.77             | X             | 0.79          | 0.52          | 0.63          | 0.49          | 0.70          |
|                     | NA                 | NA               | NA            | (0.72 - 0.82) | (0.41 - 0.56) | (0.58 - 0.68) | (0.43 - 0.51) | (0.61 - 0.75) |

**Supplementary Table 2.** Outcomes of planned contrasts for apparent fibre density (AFD) values derived for tracts projecting between homologous regions of interest. Pairwise comparisons using least squared means were conducted in the context of a mixed effects model based upon rank transformed AFD values. Following FDR correction for multiple comparisons, instances of p values smaller than the adjusted alpha level are highlighted in bold font. Each contrast is labeled with reference to the pair of homologous tracts from which it is composed. For example, ‘CMA – M1a’ represents the comparison between AFD values derived for CMA-CMA homologous tracts and AFD values derived for M1a-M1a homologous tracts.

| <b>Contrast</b> | <b>df</b> | <b>t</b> | <b>p</b>         |
|-----------------|-----------|----------|------------------|
| CMA - M1a       | 252.057   | -13.575  | <b>&lt;0.001</b> |
| CMA - M1p       | 268.941   | 1.518    | 0.130            |
| CMA - PMd       | 252.057   | -15.213  | <b>&lt;0.001</b> |
| CMA - PMv       | 253.619   | -1.867   | 0.068            |
| CMA - preSMA    | 252.057   | -8.770   | <b>&lt;0.001</b> |
| CMA - S1        | 254.216   | -5.114   | <b>&lt;0.001</b> |
| CMA - SMAproper | 252.057   | -11.112  | <b>&lt;0.001</b> |
| M1a - M1p       | 268.941   | 9.643    | <b>&lt;0.001</b> |
| M1a - PMd       | 252.057   | -1.638   | 0.106            |
| M1a - PMv       | 253.619   | 11.345   | <b>&lt;0.001</b> |
| M1a - preSMA    | 252.057   | 4.805    | <b>&lt;0.001</b> |
| M1a - S1        | 254.216   | 7.998    | <b>&lt;0.001</b> |

|                       |         |         |                  |
|-----------------------|---------|---------|------------------|
| M1a - SMAproper       | 252.057 | 2.462   | <b>0.017</b>     |
| M1p - PMd             | 268.941 | -10.623 | <b>&lt;0.001</b> |
| M1p - PMv             | 271.140 | -2.630  | <b>0.011</b>     |
| M1p - preSMA          | 268.941 | -6.767  | <b>&lt;0.001</b> |
| M1p - S1              | 267.925 | -4.637  | <b>&lt;0.001</b> |
| M1p - SMAproper       | 268.941 | -8.169  | <b>&lt;0.001</b> |
| PMd - PMv             | 253.619 | 12.939  | <b>&lt;0.001</b> |
| PMd - preSMA          | 252.057 | 6.443   | <b>&lt;0.001</b> |
| PMd - S1              | 254.216 | 9.581   | <b>&lt;0.001</b> |
| PMd - SMAproper       | 252.057 | 4.101   | <b>&lt;0.001</b> |
| PMv - preSMA          | 253.619 | -6.669  | <b>&lt;0.001</b> |
| PMv - S1              | 256.019 | -3.178  | <b>0.002</b>     |
| PMv - SMAproper       | 253.619 | -8.948  | <b>&lt;0.001</b> |
| preSMA - S1           | 254.216 | 3.357   | <b>0.001</b>     |
| preSMA -<br>SMAproper | 252.057 | -2.342  | <b>0.022</b>     |
| S1 - SMAproper        | 254.216 | -5.620  | <b>&lt;0.001</b> |

**Supplementary Table 3.** Outcomes of planned contrasts for fractional anisotropy (FA) values derived for tracts projecting between homologous regions of interest. Pairwise comparisons using least squared means were conducted in the context of a mixed effects model based upon rank transformed FA values. Following FDR correction for multiple comparisons, instances of p values smaller than the adjusted alpha level are highlighted in bold font. Each contrast is labeled

with reference to the pair of homologous tracts from which it is composed. For example, ‘CMA – M1a’ represents the comparison between FA values derived for CMA-CMA homologous tracts and FA values derived for M1a-M1a homologous tracts.

| <b>Contrast</b> | <b>df</b> | <b>t</b> | <b>p</b>         |
|-----------------|-----------|----------|------------------|
| CMA - M1a       | 252.034   | -10.852  | <b>&lt;0.001</b> |
| CMA - M1p       | 265.436   | 1.556    | 0.130            |
| CMA - PMd       | 252.034   | -15.153  | <b>&lt;0.001</b> |
| CMA - PMv       | 253.257   | -1.840   | 0.075            |
| CMA - preSMA    | 252.034   | -11.228  | <b>&lt;0.001</b> |
| CMA - S1        | 253.754   | -5.267   | <b>&lt;0.001</b> |
| CMA - SMAproper | 252.034   | -12.751  | <b>&lt;0.001</b> |
| M1a - M1p       | 265.436   | 8.024    | <b>&lt;0.001</b> |
| M1a - PMd       | 252.034   | -4.301   | <b>&lt;0.001</b> |
| M1a - PMv       | 253.257   | 8.718    | <b>&lt;0.001</b> |
| M1a - preSMA    | 252.034   | -0.376   | 0.707            |
| M1a - S1        | 253.754   | 5.210    | <b>&lt;0.001</b> |
| M1a - SMAproper | 252.034   | -1.899   | 0.069            |
| M1p - PMd       | 265.436   | -10.588  | <b>&lt;0.001</b> |
| M1p - PMv       | 267.295   | -2.646   | <b>0.011</b>     |
| M1p - preSMA    | 265.436   | -8.248   | <b>&lt;0.001</b> |
| M1p - S1        | 264.583   | -4.759   | <b>&lt;0.001</b> |
| M1p - SMAproper | 265.436   | -9.156   | <b>&lt;0.001</b> |

|                       |         |         |                  |
|-----------------------|---------|---------|------------------|
| PMd - PMv             | 253.257 | 12.902  | <b>&lt;0.001</b> |
| PMd - preSMA          | 252.034 | 3.925   | <b>&lt;0.001</b> |
| PMd - S1              | 253.754 | 9.362   | <b>&lt;0.001</b> |
| PMd - SMAproper       | 252.034 | 2.402   | <b>0.021</b>     |
| PMv - preSMA          | 253.257 | -9.084  | <b>&lt;0.001</b> |
| PMv - S1              | 255.185 | -3.352  | <b>0.001</b>     |
| PMv - SMAproper       | 253.257 | -10.565 | <b>&lt;0.001</b> |
| preSMA - S1           | 253.754 | 5.573   | <b>&lt;0.001</b> |
| preSMA -<br>SMAproper | 252.034 | -1.523  | 0.134            |
| S1 - SMAproper        | 253.754 | -7.043  | <b>&lt;0.001</b> |

**Supplementary Table 4.** Mean diffusivity and radial diffusivity values in  $\text{mm}^2/\text{s}$ . Data are presented separately for fibre tracts connecting each node of the cortical motor network in the left (L) hemisphere to the corresponding nodes in the right (R) hemisphere. The symbol X denotes instances in which no tracts were detected (i.e. in any participant). In some other cases the estimates are based upon fibre bundles wherein only a small number of streamlines were reconstructed, or upon streamlines that were reconstructed for a subset of participants

(Supplementary Table 1). Due to the nature of the extremely small numbers derived for both of these indices, all values have been multiplied by a factor of  $10^8$ .

| <b>Mean Diffusivity</b>   |             |           |         |         |         |         |         |         |
|---------------------------|-------------|-----------|---------|---------|---------|---------|---------|---------|
|                           | R SMAproper | R pre-SMA | R CMA   | R M1a   | R M1p   | R PMd   | R PMv   | R S1    |
| L SMAproper               | 69180.0     | 69707.0   | 69051.0 | 71208.0 | X       | 69186.0 | 69994.0 | 66934.0 |
| L pre-SMA                 | 70015.5     | 70362.0   | 70668.0 | 73191.0 | X       | 70538.0 | 71211.5 | 72324.5 |
| L CMA                     | 69000.0     | 70097.0   | 71127.0 | 69706.0 | 70933.0 | 68721.0 | 70301.0 | 69888.5 |
| L M1a                     | 69412.0     | 71013.0   | 69697.0 | 69682.0 | 71045.5 | 69154.0 | 70408.0 | 70143.0 |
| L M1p                     | 72616.0     | X         | X       | 71392.0 | 70320.0 | 69917.0 | 70657.0 | 72429.0 |
| L PMd                     | 69185.0     | 70036.0   | 69136.0 | 69144.0 | 70037.5 | 69476.0 | 69486.0 | 70138.0 |
| L PMv                     | 69388.0     | 70629.0   | 70024.0 | 70394.0 | 72296.0 | 69531.0 | 69285.0 | 71189.0 |
| L S1                      | X           | 71637.0   | X       | 71583.0 | 71909.0 | 70731.0 | 70894.0 | 72128.0 |
|                           |             |           |         |         |         |         |         |         |
| <b>Radial Diffusivity</b> |             |           |         |         |         |         |         |         |
|                           | R SMAproper | R pre-SMA | R CMA   | R M1a   | R M1p   | R PMd   | R PMv   | R S1    |
| L SMAproper               | 48335.0     | 48414.5   | 53563.5 | 52392.0 | X       | 47215.0 | 52306.0 | 56953.0 |
| L pre-SMA                 | 50144.0     | 49520.0   | 54481.0 | 62695.0 | X       | 47911.0 | 54059.0 | 55862.5 |
| L CMA                     | 53721.0     | 54990.0   | 57117.0 | 54274.5 | 53107.0 | 52884.0 | 56625.0 | 54665.5 |
| L M1a                     | 50078.5     | 53202.0   | 54383.0 | 49851.0 | 51951.0 | 49676.0 | 55952.0 | 50853.0 |
| L M1p                     | 58760.0     | X         | X       | 55502.5 | 56932.0 | 56356.0 | 58778.0 | 57308.0 |
| L PMd                     | 46850.0     | 47396.0   | 52468.0 | 49088.0 | 55838.0 | 48756.0 | 53626.0 | 52312.0 |
| L PMv                     | 52463.0     | 53474.5   | 54906.0 | 57266.0 | 59669.0 | 53643.0 | 55187.0 | 58863.0 |
| L S1                      | X           | 51290.0   | X       | 53416.5 | 57897.0 | 56809.0 | 59220.0 | 54070.0 |



**Supplementary Table 5.** Outcomes of planned contrasts for apparent fibre density (AFD) values derived for tracts projecting between non-homologous regions of interest. Pairwise comparisons using least squared means were conducted in the context of a mixed effects model based upon rank transformed AFD values. Following FDR correction for multiple comparisons, instances of p values smaller than the adjusted alpha level are highlighted in bold font. Under each “Target region” subsection of the table, each contrast is labeled with reference to the source ROIs (i.e. those projecting to the target ROI) for the two tracts being compared. For example, in the Target region: CMA subsection, ‘CMA – M1a’ represents the comparison between the AFD values derived for CMA-CMA tracts and the AFD values derived for CMA-M1a tracts.

| Target region: CMA |         |         |                  |
|--------------------|---------|---------|------------------|
| Contrast           | df      | t.ratio | p.value          |
| CMA - M1a          | 246.004 | -6.670  | <b>&lt;0.001</b> |
| CMA - M1p          | 251.889 | -2.807  | <b>0.010</b>     |
| CMA - PMd          | 246.004 | -10.545 | <b>&lt;0.001</b> |
| CMA - PMv          | 246.102 | -0.938  | 0.425            |
| CMA - preSMA       | 246.004 | -4.267  | <b>&lt;0.001</b> |
| CMA - S1           | 247.190 | -4.077  | <b>&lt;0.001</b> |
| CMA - SMAproper    | 246.004 | -6.159  | <b>&lt;0.001</b> |
| M1a - M1p          | 251.889 | 0.091   | 0.927            |
| M1a - PMd          | 246.004 | -3.875  | <b>&lt;0.001</b> |
| M1a - PMv          | 246.102 | 5.688   | <b>&lt;0.001</b> |
| M1a - preSMA       | 246.004 | 2.403   | <b>0.029</b>     |
| M1a - S1           | 247.190 | 2.138   | 0.052            |
| M1a - SMAproper    | 246.004 | 0.511   | 0.683            |
| M1p - PMd          | 251.889 | -1.775  | 0.108            |
| M1p - PMv          | 252.186 | 2.388   | <b>0.029</b>     |
| M1p - preSMA       | 251.889 | 0.953   | 0.425            |
| M1p - S1           | 251.506 | 0.897   | 0.433            |

|                    |         |         |                |
|--------------------|---------|---------|----------------|
| M1p - SMAproper    | 251.889 | 0.131   | 0.927          |
| PMd - PMv          | 246.102 | 9.536   | < <b>0.001</b> |
| PMd - preSMA       | 246.004 | 6.277   | < <b>0.001</b> |
| PMd - S1           | 247.190 | 5.749   | < <b>0.001</b> |
| PMd - SMAproper    | 246.004 | 4.385   | < <b>0.001</b> |
| PMv - preSMA       | 246.102 | -3.301  | <b>0.002</b>   |
| PMv - S1           | 247.329 | -3.177  | <b>0.003</b>   |
| PMv - SMAproper    | 246.102 | -5.181  | < <b>0.001</b> |
| preSMA - S1        | 247.190 | -0.100  | 0.927          |
| preSMA - SMAproper | 246.004 | -1.892  | 0.088          |
| S1 - SMAproper     | 247.190 | -1.663  | 0.130          |
|                    |         |         |                |
| Target region: M1a |         |         |                |
| Contrast           | df      | t.ratio | p.value        |
| CMA - M1a          | 219.122 | -9.757  | < <b>0.001</b> |
| CMA - M1p          | 223.229 | -3.157  | <b>0.003</b>   |
| CMA - PMd          | 219.122 | -11.231 | < <b>0.001</b> |
| CMA - PMv          | 223.804 | 1.422   | 0.175          |
| CMA - preSMA       | 231.451 | 0.425   | 0.696          |
| CMA - S1           | 219.122 | -6.738  | < <b>0.001</b> |
| CMA - SMAproper    | 223.448 | -3.290  | <b>0.002</b>   |
| M1a - M1p          | 223.229 | 5.592   | < <b>0.001</b> |
| M1a - PMd          | 219.122 | -1.474  | 0.166          |
| M1a - PMv          | 223.804 | 10.072  | < <b>0.001</b> |
| M1a - preSMA       | 231.451 | 5.686   | < <b>0.001</b> |
| M1a - S1           | 219.122 | 3.020   | <b>0.004</b>   |
| M1a - SMAproper    | 223.448 | 5.456   | < <b>0.001</b> |
| M1p - PMd          | 223.229 | -6.914  | < <b>0.001</b> |
| M1p - PMv          | 226.293 | 4.161   | < <b>0.001</b> |
| M1p - preSMA       | 232.686 | 2.240   | <b>0.032</b>   |
| M1p - S1           | 223.229 | -2.885  | <b>0.006</b>   |
| M1p - SMAproper    | 226.624 | -0.123  | 0.903          |
| PMd - PMv          | 223.804 | 11.378  | < <b>0.001</b> |
| PMd - preSMA       | 231.451 | 6.480   | < <b>0.001</b> |

|                    |         |         |                  |
|--------------------|---------|---------|------------------|
| PMd - S1           | 219.122 | 4.493   | <b>&lt;0.001</b> |
| PMd - SMAproper    | 223.448 | 6.777   | <b>&lt;0.001</b> |
| PMv - preSMA       | 230.599 | -0.425  | 0.696            |
| PMv - S1           | 223.804 | -7.395  | <b>&lt;0.001</b> |
| PMv - SMAproper    | 223.893 | -4.310  | <b>&lt;0.001</b> |
| preSMA - S1        | 231.451 | -4.058  | <b>&lt;0.001</b> |
| preSMA - SMAproper | 230.790 | -2.332  | <b>0.026</b>     |
| S1 - SMAproper     | 223.448 | 2.750   | <b>0.009</b>     |
|                    |         |         |                  |
| Target region: M1p |         |         |                  |
| Contrast           | df      | t.ratio | p.value          |
| CMA - M1a          | 82.619  | 0.238   | 0.893            |
| CMA - M1p          | 81.716  | 3.413   | <b>0.004</b>     |
| CMA - PMd          | 83.245  | 3.100   | <b>0.008</b>     |
| CMA - PMv          | 82.958  | 4.145   | <b>&lt;0.001</b> |
| CMA - S1           | 82.448  | 2.602   | <b>0.026</b>     |
| CMA - SMAproper    | 85.705  | 0.189   | 0.893            |
| M1a - M1p          | 83.516  | 4.773   | <b>&lt;0.001</b> |
| M1a - PMd          | 83.812  | 5.750   | <b>&lt;0.001</b> |
| M1a - PMv          | 82.392  | 6.610   | <b>&lt;0.001</b> |
| M1a - S1           | 81.089  | 4.444   | <b>&lt;0.001</b> |
| M1a - SMAproper    | 85.592  | 0.095   | 0.925            |
| M1p - PMd          | 83.635  | -1.010  | 0.420            |
| M1p - PMv          | 82.919  | 0.766   | 0.520            |
| M1p - S1           | 83.049  | -1.521  | 0.224            |
| M1p - SMAproper    | 85.969  | -1.494  | 0.224            |
| PMd - PMv          | 84.146  | 2.198   | <b>0.064</b>     |
| PMd - S1           | 81.787  | -0.825  | 0.509            |
| PMd - SMAproper    | 85.788  | -1.211  | 0.344            |
| PMv - S1           | 82.819  | -2.708  | <b>0.022</b>     |
| PMv - SMAproper    | 84.875  | -1.831  | 0.135            |
| S1 - SMAproper     | 86.049  | -1.001  | 0.420            |
|                    |         |         |                  |
| Target region: PMd |         |         |                  |

| Contrast           | df      | t.ratio | p.value        |
|--------------------|---------|---------|----------------|
| CMA - M1a          | 287.006 | -11.846 | < <b>0.001</b> |
| CMA - M1p          | 288.648 | 6.134   | < <b>0.001</b> |
| CMA - PMd          | 287.006 | -11.154 | < <b>0.001</b> |
| CMA - PMv          | 287.006 | 1.423   | 0.190          |
| CMA - preSMA       | 287.006 | -8.833  | < <b>0.001</b> |
| CMA - S1           | 287.006 | 0.390   | 0.697          |
| CMA - SMAproper    | 287.006 | -10.700 | < <b>0.001</b> |
| M1a - M1p          | 288.648 | 17.389  | < <b>0.001</b> |
| M1a - PMd          | 287.006 | 0.693   | 0.527          |
| M1a - PMv          | 287.006 | 13.269  | < <b>0.001</b> |
| M1a - preSMA       | 287.006 | 3.013   | <b>0.004</b>   |
| M1a - S1           | 287.006 | 12.236  | < <b>0.001</b> |
| M1a - SMAproper    | 287.006 | 1.147   | 0.295          |
| M1p - PMd          | 288.648 | -16.731 | < <b>0.001</b> |
| M1p - PMv          | 288.648 | -4.782  | < <b>0.001</b> |
| M1p - preSMA       | 288.648 | -14.526 | < <b>0.001</b> |
| M1p - S1           | 288.648 | -5.763  | < <b>0.001</b> |
| M1p - SMAproper    | 288.648 | -16.300 | < <b>0.001</b> |
| PMd - PMv          | 287.006 | 12.576  | < <b>0.001</b> |
| PMd - preSMA       | 287.006 | 2.320   | <b>0.028</b>   |
| PMd - S1           | 287.006 | 11.544  | < <b>0.001</b> |
| PMd - SMAproper    | 287.006 | 0.454   | 0.674          |
| PMv - preSMA       | 287.006 | -10.256 | < <b>0.001</b> |
| PMv - S1           | 287.006 | -1.033  | 0.339          |
| PMv - SMAproper    | 287.006 | -12.123 | < <b>0.001</b> |
| preSMA - S1        | 287.006 | 9.223   | < <b>0.001</b> |
| preSMA - SMAproper | 287.006 | -1.866  | 0.080          |
| S1 - SMAproper     | 287.006 | -11.090 | < <b>0.001</b> |
|                    |         |         |                |
| Target region: PMv |         |         |                |
| Contrast           | df      | t.ratio | p.value        |
| CMA - M1a          | 219.885 | -1.724  | 0.105          |
| CMA - M1p          | 225.089 | 2.210   | <b>0.041</b>   |

|                       |         |         |                  |
|-----------------------|---------|---------|------------------|
| CMA - PMd             | 215.783 | -4.916  | <b>&lt;0.001</b> |
| CMA - PMv             | 215.947 | -1.791  | 0.096            |
| CMA - preSMA          | 216.685 | -3.621  | <b>0.001</b>     |
| CMA - S1              | 224.945 | 1.956   | 0.072            |
| CMA - SMAproper       | 216.575 | -6.383  | <b>&lt;0.001</b> |
| M1a - M1p             | 222.649 | 3.401   | <b>0.002</b>     |
| M1a - PMd             | 220.372 | -2.657  | <b>0.013</b>     |
| M1a - PMv             | 221.088 | 0.089   | 0.929            |
| M1a - preSMA          | 221.754 | -1.539  | 0.140            |
| M1a - S1              | 223.046 | 3.176   | <b>0.003</b>     |
| M1a - SMAproper       | 220.534 | -4.004  | <b>&lt;0.001</b> |
| M1p - PMd             | 225.399 | -5.676  | <b>&lt;0.001</b> |
| M1p - PMv             | 226.785 | -3.448  | <b>0.002</b>     |
| M1p - preSMA          | 226.490 | -4.757  | <b>&lt;0.001</b> |
| M1p - S1              | 219.823 | -0.256  | 0.828            |
| M1p - SMAproper       | 225.055 | -6.735  | <b>&lt;0.001</b> |
| PMd - PMv             | 216.502 | 3.014   | <b>0.005</b>     |
| PMd - preSMA          | 216.038 | 1.204   | 0.248            |
| PMd - S1              | 225.287 | 5.508   | <b>&lt;0.001</b> |
| PMd - SMAproper       | 215.950 | -1.544  | 0.140            |
| PMv - preSMA          | 216.838 | -1.786  | 0.096            |
| PMv - S1              | 226.578 | 3.228   | <b>0.003</b>     |
| PMv - SMAproper       | 217.347 | -4.476  | <b>&lt;0.001</b> |
| preSMA - S1           | 227.123 | 4.558   | <b>&lt;0.001</b> |
| preSMA - SMAproper    | 216.166 | -2.705  | <b>0.012</b>     |
| S1 - SMAproper        | 225.723 | -6.579  | <b>&lt;0.001</b> |
|                       |         |         |                  |
| Target region: PreSMA |         |         |                  |
| Contrast              | df      | t.ratio | p.value          |
| CMA - M1a             | 179.804 | 0.263   | 0.877            |
| CMA - PMd             | 174.011 | -13.950 | <b>&lt;0.001</b> |
| CMA - PMv             | 174.521 | -1.830  | 0.097            |
| CMA - preSMA          | 174.011 | -10.202 | <b>&lt;0.001</b> |
| CMA - S1              | 180.693 | 0.160   | 0.917            |

|                    |         |         |                  |
|--------------------|---------|---------|------------------|
| CMA - SMAproper    | 174.011 | -9.785  | <b>&lt;0.001</b> |
| M1a - PMd          | 179.804 | -7.657  | <b>&lt;0.001</b> |
| M1a - PMv          | 179.614 | -1.249  | 0.280            |
| M1a - preSMA       | 179.804 | -5.671  | <b>&lt;0.001</b> |
| M1a - S1           | 180.332 | -0.007  | 0.995            |
| M1a - SMAproper    | 179.804 | -5.449  | <b>&lt;0.001</b> |
| PMd - PMv          | 174.521 | 11.814  | <b>&lt;0.001</b> |
| PMd - preSMA       | 174.011 | 3.748   | <b>&lt;0.001</b> |
| PMd - S1           | 180.693 | 4.873   | <b>&lt;0.001</b> |
| PMd - SMAproper    | 174.011 | 4.165   | <b>&lt;0.001</b> |
| PMv - preSMA       | 174.521 | -8.149  | <b>&lt;0.001</b> |
| PMv - S1           | 180.613 | 0.791   | 0.531            |
| PMv - SMAproper    | 174.521 | -7.740  | <b>&lt;0.001</b> |
| preSMA - S1        | 180.693 | 3.607   | <b>0.001</b>     |
| preSMA - SMAproper | 174.011 | 0.418   | 0.789            |
| S1 - SMAproper     | 180.693 | -3.466  | <b>0.001</b>     |
|                    |         |         |                  |
| Target region: S1  |         |         |                  |
| Contrast           | df      | t.ratio | p.value          |
| CMA - M1a          | 159.051 | -6.798  | <b>&lt;0.001</b> |
| CMA - M1p          | 161.566 | 0.725   | 0.597            |
| CMA - PMd          | 159.051 | -2.255  | <b>0.045</b>     |
| CMA - PMv          | 162.626 | 3.075   | <b>0.007</b>     |
| CMA - preSMA       | 165.010 | -0.172  | 0.879            |
| CMA - S1           | 159.175 | -1.921  | 0.088            |
| CMA - SMAproper    | 167.177 | 2.054   | 0.068            |
| M1a - M1p          | 161.562 | 6.796   | <b>&lt;0.001</b> |
| M1a - PMd          | 156.250 | 4.894   | <b>&lt;0.001</b> |
| M1a - PMv          | 163.202 | 8.364   | <b>&lt;0.001</b> |
| M1a - preSMA       | 165.400 | 2.314   | <b>0.042</b>     |
| M1a - S1           | 158.186 | 4.991   | <b>&lt;0.001</b> |
| M1a - SMAproper    | 167.050 | 5.219   | <b>&lt;0.001</b> |
| M1p - PMd          | 161.562 | -2.762  | <b>0.015</b>     |
| M1p - PMv          | 161.750 | 2.304   | <b>0.042</b>     |

|                          |         |         |                  |
|--------------------------|---------|---------|------------------|
| M1p - preSMA             | 165.380 | -0.474  | 0.712            |
| M1p - S1                 | 160.062 | -2.476  | <b>0.031</b>     |
| M1p - SMAproper          | 167.846 | 1.614   | 0.152            |
| PMd - PMv                | 163.202 | 4.897   | <b>&lt;0.001</b> |
| PMd - preSMA             | 165.400 | 0.652   | 0.627            |
| PMd - S1                 | 158.186 | 0.285   | 0.835            |
| PMd - SMAproper          | 167.050 | 3.124   | <b>0.007</b>     |
| PMv - preSMA             | 164.756 | -1.617  | 0.152            |
| PMv - S1                 | 162.608 | -4.615  | <b>&lt;0.001</b> |
| PMv - SMAproper          | 165.693 | 0.152   | 0.879            |
| preSMA - S1              | 165.165 | -0.550  | 0.681            |
| preSMA - SMAproper       | 165.380 | 1.499   | 0.181            |
| S1 - SMAproper           | 167.188 | 2.972   | <b>0.009</b>     |
|                          |         |         |                  |
| Target Region SMA proper |         |         |                  |
| Contrast                 | df      | t.ratio | p.value          |
| CMA - M1a                | 202.931 | -4.306  | <b>&lt;0.001</b> |
| CMA - M1p                | 216.455 | -1.265  | 0.264            |
| CMA - PMd                | 199.047 | -12.077 | <b>&lt;0.001</b> |
| CMA - PMv                | 199.622 | -3.433  | <b>0.001</b>     |
| CMA - preSMA             | 199.047 | -6.975  | <b>&lt;0.001</b> |
| CMA - S1                 | 212.230 | 3.526   | <b>0.001</b>     |
| CMA - SMAproper          | 199.047 | -9.474  | <b>&lt;0.001</b> |
| M1a - M1p                | 217.077 | -0.300  | 0.793            |
| M1a - PMd                | 202.931 | -6.509  | <b>&lt;0.001</b> |
| M1a - PMv                | 202.940 | 1.177   | 0.292            |
| M1a - preSMA             | 202.931 | -1.940  | 0.072            |
| M1a - S1                 | 211.860 | 5.501   | <b>&lt;0.001</b> |
| M1a - SMAproper          | 202.931 | -4.178  | <b>&lt;0.001</b> |
| M1p - PMd                | 216.455 | -1.153  | 0.292            |
| M1p - PMv                | 216.416 | 0.568   | 0.615            |
| M1p - preSMA             | 216.455 | -0.132  | 0.895            |
| M1p - S1                 | 216.807 | 2.662   | <b>0.013</b>     |
| M1p - SMAproper          | 216.455 | -0.632  | 0.591            |

|                    |         |        |                  |
|--------------------|---------|--------|------------------|
| PMd - PMv          | 199.622 | 8.479  | <b>&lt;0.001</b> |
| PMd - preSMA       | 199.047 | 5.103  | <b>&lt;0.001</b> |
| PMd - S1           | 212.230 | 8.775  | <b>&lt;0.001</b> |
| PMd - SMAproper    | 199.047 | 2.603  | <b>0.015</b>     |
| PMv - preSMA       | 199.622 | -3.446 | <b>0.001</b>     |
| PMv - S1           | 212.754 | 5.015  | <b>&lt;0.001</b> |
| PMv - SMAproper    | 199.622 | -5.912 | <b>&lt;0.001</b> |
| preSMA - S1        | 212.230 | 6.557  | <b>&lt;0.001</b> |
| preSMA - SMAproper | 199.047 | -2.500 | <b>0.019</b>     |
| S1 - SMAproper     | 212.230 | -7.644 | <b>&lt;0.001</b> |

**Supplementary Table 6.** Outcomes of planned contrasts for fractional anisotropy (FA) values derived for tracts projecting between non-homologous regions of interest. Pairwise comparisons using least squared means were conducted in the context of a mixed effects model based upon rank transformed FA values. Following FDR correction for multiple comparisons, instances of p values smaller than the adjusted alpha level are highlighted in bold font. Under each “Target region” subsection of the table, each contrast is labeled with reference to the source ROIs (i.e. those projecting to the target ROI) for the two tracts being compared. For example, in the Target region: CMA subsection, ‘CMA – M1a’ represents the comparison between the FA values derived for CMA-CMA tracts and the FA values derived for CMA-M1a tracts.

| <b>Target region: SMA proper</b> |         |         |                  |
|----------------------------------|---------|---------|------------------|
| Contrast                         | df      | t       | p                |
| CMA - M1a                        | 202.948 | -3.714  | <b>&lt;0.001</b> |
| CMA - M1p                        | 216.522 | -0.577  | 0.632            |
| CMA - PMd                        | 199.047 | -13.059 | <b>&lt;0.001</b> |
| CMA - PMv                        | 199.625 | -4.026  | <b>&lt;0.001</b> |
| CMA - preSMA                     | 199.047 | -8.401  | <b>&lt;0.001</b> |
| CMA - S1                         | 212.286 | 2.166   | <b>0.046</b>     |



|                               |         |         |                |
|-------------------------------|---------|---------|----------------|
| CMA - SMAproper               | 199.047 | -10.280 | < <b>0.001</b> |
| M1a - M1p                     | 217.146 | 0.251   | 0.841          |
| M1a - PMd                     | 202.948 | -7.980  | < <b>0.001</b> |
| M1a - PMv                     | 202.956 | 0.059   | 0.953          |
| M1a - preSMA                  | 202.948 | -3.808  | < <b>0.001</b> |
| M1a - S1                      | 211.914 | 3.888   | < <b>0.001</b> |
| M1a - SMAproper               | 202.948 | -5.491  | < <b>0.001</b> |
| M1p - PMd                     | 216.522 | -2.037  | 0.060          |
| M1p - PMv                     | 216.483 | -0.240  | 0.841          |
| M1p - preSMA                  | 216.522 | -1.105  | 0.316          |
| M1p - S1                      | 216.875 | 1.452   | 0.180          |
| M1p - SMAproper               | 216.522 | -1.481  | 0.178          |
| PMd - PMv                     | 199.625 | 8.855   | < <b>0.001</b> |
| PMd - preSMA                  | 199.047 | 4.658   | < <b>0.001</b> |
| PMd - S1                      | 212.286 | 7.842   | < <b>0.001</b> |
| PMd - SMAproper               | 199.047 | 2.779   | <b>0.009</b>   |
| PMv - preSMA                  | 199.625 | -4.260  | < <b>0.001</b> |
| PMv - S1                      | 212.811 | 3.922   | < <b>0.001</b> |
| PMv - SMAproper               | 199.625 | -6.114  | < <b>0.001</b> |
| preSMA - S1                   | 212.286 | 5.817   | < <b>0.001</b> |
| preSMA - SMAproper            | 199.047 | -1.879  | 0.082          |
| S1 - SMAproper                | 212.286 | -6.634  | < <b>0.001</b> |
|                               |         |         |                |
| <b>Target region: Pre-SMA</b> |         |         |                |
| Contrast                      | df      | t       | p              |
| CMA - M1a                     | 182.712 | -0.802  | 0.468          |
| CMA - PMd                     | 174.025 | -15.085 | < <b>0.001</b> |
| CMA - PMv                     | 174.764 | -2.221  | <b>0.041</b>   |
| CMA - preSMA                  | 174.025 | -10.905 | < <b>0.001</b> |
| CMA - S1                      | 184.082 | -1.436  | 0.200          |
| CMA - SMAproper               | 174.025 | -10.084 | < <b>0.001</b> |
| M1a - PMd                     | 182.712 | -7.229  | < <b>0.001</b> |
| M1a - PMv                     | 182.437 | -0.405  | 0.686          |
| M1a - preSMA                  | 182.712 | -5.004  | < <b>0.001</b> |

|                           |         |        |                |
|---------------------------|---------|--------|----------------|
| M1a - S1                  | 183.552 | -0.818 | 0.468          |
| M1a - SMAproper           | 182.712 | -4.567 | < <b>0.001</b> |
| PMd - PMv                 | 174.764 | 12.539 | < <b>0.001</b> |
| PMd - preSMA              | 174.025 | 4.180  | < <b>0.001</b> |
| PMd - S1                  | 184.082 | 3.686  | < <b>0.001</b> |
| PMd - SMAproper           | 174.025 | 5.001  | < <b>0.001</b> |
| PMv - preSMA              | 174.764 | -8.449 | < <b>0.001</b> |
| PMv - S1                  | 183.967 | -0.664 | 0.533          |
| PMv - SMAproper           | 174.764 | -7.646 | < <b>0.001</b> |
| preSMA - S1               | 184.082 | 2.267  | <b>0.040</b>   |
| preSMA - SMAproper        | 174.025 | 0.821  | 0.468          |
| S1 - SMAproper            | 184.082 | -1.988 | 0.068          |
|                           |         |        |                |
| <b>Target region: CMA</b> |         |        |                |
| Contrast                  | df      | t      | p              |
| CMA - M1a                 | 246.005 | -4.736 | < <b>0.001</b> |
| CMA - M1p                 | 252.293 | -3.118 | <b>0.004</b>   |
| CMA - PMd                 | 246.005 | -9.765 | < <b>0.001</b> |
| CMA - PMv                 | 246.110 | -1.291 | 0.326          |
| CMA - preSMA              | 246.005 | -4.682 | < <b>0.001</b> |
| CMA - S1                  | 247.270 | -4.541 | < <b>0.001</b> |
| CMA - SMAproper           | 246.005 | -5.651 | < <b>0.001</b> |
| M1a - M1p                 | 252.293 | -1.059 | 0.407          |
| M1a - PMd                 | 246.005 | -5.029 | < <b>0.001</b> |
| M1a - PMv                 | 246.110 | 3.413  | <b>0.002</b>   |
| M1a - preSMA              | 246.005 | 0.054  | 0.957          |
| M1a - S1                  | 247.270 | -0.128 | 0.932          |
| M1a - SMAproper           | 246.005 | -0.915 | 0.440          |
| M1p - PMd                 | 252.293 | -1.127 | 0.406          |
| M1p - PMv                 | 252.609 | 2.543  | <b>0.020</b>   |
| M1p - preSMA              | 252.293 | 1.083  | 0.407          |
| M1p - S1                  | 251.886 | 0.989  | 0.424          |
| M1p - SMAproper           | 252.293 | 0.661  | 0.570          |
| PMd - PMv                 | 246.110 | 8.409  | < <b>0.001</b> |

|                           |         |         |                |
|---------------------------|---------|---------|----------------|
| PMd - preSMA              | 246.005 | 5.083   | < <b>0.001</b> |
| PMd - S1                  | 247.270 | 4.559   | < <b>0.001</b> |
| PMd - SMAproper           | 246.005 | 4.114   | < <b>0.001</b> |
| PMv - preSMA              | 246.110 | -3.359  | <b>0.002</b>   |
| PMv - S1                  | 247.419 | -3.309  | <b>0.002</b>   |
| PMv - SMAproper           | 246.110 | -4.322  | < <b>0.001</b> |
| preSMA - S1               | 247.270 | -0.178  | 0.925          |
| preSMA - SMAproper        | 246.005 | -0.970  | 0.424          |
| S1 - SMAproper            | 247.270 | -0.725  | 0.547          |
|                           |         |         |                |
| <b>Target region: M1a</b> |         |         |                |
| Contrast                  | df      | t       | p              |
| CMA - M1a                 | 219.142 | -9.139  | < <b>0.001</b> |
| CMA - M1p                 | 223.545 | -3.153  | <b>0.003</b>   |
| CMA - PMd                 | 219.142 | -10.817 | < <b>0.001</b> |
| CMA - PMv                 | 224.155 | 1.923   | 0.068          |
| CMA - preSMA              | 232.391 | -0.927  | 0.368          |
| CMA - S1                  | 219.142 | -7.149  | < <b>0.001</b> |
| CMA - SMAproper           | 223.772 | -3.778  | < <b>0.001</b> |
| M1a - M1p                 | 223.545 | 5.045   | < <b>0.001</b> |
| M1a - PMd                 | 219.142 | -1.678  | 0.111          |
| M1a - PMv                 | 224.155 | 10.028  | < <b>0.001</b> |
| M1a - preSMA              | 232.391 | 4.005   | < <b>0.001</b> |
| M1a - S1                  | 219.142 | 1.990   | 0.061          |
| M1a - SMAproper           | 223.772 | 4.418   | < <b>0.001</b> |
| M1p - PMd                 | 223.545 | -6.550  | < <b>0.001</b> |
| M1p - PMv                 | 226.833 | 4.617   | < <b>0.001</b> |
| M1p - preSMA              | 233.690 | 0.935   | 0.368          |
| M1p - S1                  | 223.545 | -3.260  | <b>0.002</b>   |
| M1p - SMAproper           | 227.181 | -0.572  | 0.568          |
| PMd - PMv                 | 224.155 | 11.517  | < <b>0.001</b> |
| PMd - preSMA              | 232.391 | 4.911   | < <b>0.001</b> |
| PMd - S1                  | 219.142 | 3.668   | < <b>0.001</b> |
| PMd - SMAproper           | 223.772 | 5.922   | < <b>0.001</b> |

|                           |         |         |                  |
|---------------------------|---------|---------|------------------|
| PMv - preSMA              | 231.475 | -2.029  | 0.058            |
| PMv - S1                  | 224.155 | -8.263  | <b>&lt;0.001</b> |
| PMv - SMAproper           | 224.272 | -5.217  | <b>&lt;0.001</b> |
| preSMA - S1               | 232.391 | -2.931  | <b>0.005</b>     |
| preSMA - SMAproper        | 231.678 | -1.306  | 0.216            |
| S1 - SMAproper            | 223.772 | 2.633   | <b>0.013</b>     |
|                           |         |         |                  |
| <b>Target region: M1p</b> |         |         |                  |
| Contrast                  | df      | t       | p                |
| CMA - M1a                 | 84.540  | 0.490   | 0.730            |
| CMA - M1p                 | 83.415  | 3.746   | <b>&lt;0.001</b> |
| CMA - PMd                 | 85.266  | 3.955   | <b>&lt;0.001</b> |
| CMA - PMv                 | 85.019  | 5.018   | <b>&lt;0.001</b> |
| CMA - S1                  | 84.390  | 2.771   | <b>0.016</b>     |
| CMA - SMAproper           | 88.444  | 0.330   | 0.780            |
| M1a - M1p                 | 85.342  | 4.943   | <b>&lt;0.001</b> |
| M1a - PMd                 | 84.873  | 6.965   | <b>&lt;0.001</b> |
| M1a - PMv                 | 83.886  | 7.684   | <b>&lt;0.001</b> |
| M1a - S1                  | 82.136  | 4.294   | <b>&lt;0.001</b> |
| M1a - SMAproper           | 88.264  | 0.131   | 0.896            |
| M1p - PMd                 | 85.463  | -0.370  | 0.780            |
| M1p - PMv                 | 84.707  | 1.439   | 0.202            |
| M1p - S1                  | 84.879  | -1.786  | 0.125            |
| M1p - SMAproper           | 88.740  | -1.519  | 0.199            |
| PMd - PMv                 | 85.870  | 2.346   | <b>0.045</b>     |
| PMd - S1                  | 82.869  | -2.112  | 0.066            |
| PMd - SMAproper           | 88.486  | -1.453  | 0.202            |
| PMv - S1                  | 84.526  | -3.851  | <b>&lt;0.001</b> |
| PMv - SMAproper           | 87.393  | -2.112  | 0.066            |
| S1 - SMAproper            | 88.840  | -0.932  | 0.437            |
|                           |         |         |                  |
| <b>Target region: PMd</b> |         |         |                  |
| Contrast                  | df      | t       | p                |
| CMA - M1a                 | 287.004 | -10.658 | <b>&lt;0.001</b> |

|                           |         |         |                  |
|---------------------------|---------|---------|------------------|
| CMA - M1p                 | 288.358 | 8.681   | <b>&lt;0.001</b> |
| CMA - PMd                 | 287.004 | -12.120 | <b>&lt;0.001</b> |
| CMA - PMv                 | 287.004 | 1.908   | 0.073            |
| CMA - preSMA              | 287.004 | -13.282 | <b>&lt;0.001</b> |
| CMA - S1                  | 287.004 | 1.190   | 0.263            |
| CMA - SMAproper           | 287.004 | -13.501 | <b>&lt;0.001</b> |
| M1a - M1p                 | 288.358 | 18.805  | <b>&lt;0.001</b> |
| M1a - PMd                 | 287.004 | -1.461  | 0.177            |
| M1a - PMv                 | 287.004 | 12.566  | <b>&lt;0.001</b> |
| M1a - preSMA              | 287.004 | -2.623  | <b>0.012</b>     |
| M1a - S1                  | 287.004 | 11.849  | <b>&lt;0.001</b> |
| M1a - SMAproper           | 287.004 | -2.843  | <b>0.007</b>     |
| M1p - PMd                 | 288.358 | -20.193 | <b>&lt;0.001</b> |
| M1p - PMv                 | 288.358 | -6.869  | <b>&lt;0.001</b> |
| M1p - preSMA              | 288.358 | -21.297 | <b>&lt;0.001</b> |
| M1p - S1                  | 288.358 | -7.550  | <b>&lt;0.001</b> |
| M1p - SMAproper           | 288.358 | -21.505 | <b>&lt;0.001</b> |
| PMd - PMv                 | 287.004 | 14.027  | <b>&lt;0.001</b> |
| PMd - preSMA              | 287.004 | -1.162  | 0.265            |
| PMd - S1                  | 287.004 | 13.310  | <b>&lt;0.001</b> |
| PMd - SMAproper           | 287.004 | -1.382  | 0.196            |
| PMv - preSMA              | 287.004 | -15.189 | <b>&lt;0.001</b> |
| PMv - S1                  | 287.004 | -0.717  | 0.491            |
| PMv - SMAproper           | 287.004 | -15.409 | <b>&lt;0.001</b> |
| preSMA - S1               | 287.004 | 14.472  | <b>&lt;0.001</b> |
| preSMA - SMAproper        | 287.004 | -0.219  | 0.827            |
| S1 - SMAproper            | 287.004 | -14.692 | <b>&lt;0.001</b> |
|                           |         |         |                  |
| <b>Target region: PMv</b> |         |         |                  |
| Contrast                  | df      | t       | p                |
| CMA - M1a                 | 219.487 | -0.208  | 0.867            |
| CMA - M1p                 | 224.241 | 3.095   | <b>0.004</b>     |
| CMA - PMd                 | 215.723 | -4.035  | <b>&lt;0.001</b> |
| CMA - PMv                 | 215.849 | -1.211  | 0.265            |

|                          |         |        |                  |
|--------------------------|---------|--------|------------------|
| CMA - preSMA             | 216.554 | -3.987 | <b>&lt;0.001</b> |
| CMA - S1                 | 224.125 | 2.765  | <b>0.009</b>     |
| CMA - SMAproper          | 216.461 | -6.444 | <b>&lt;0.001</b> |
| M1a - M1p                | 221.982 | 3.104  | <b>0.004</b>     |
| M1a - PMd                | 219.950 | -3.391 | <b>0.002</b>     |
| M1a - PMv                | 220.595 | -0.879 | 0.426            |
| M1a - preSMA             | 221.233 | -3.359 | <b>0.002</b>     |
| M1a - S1                 | 222.353 | 2.781  | <b>0.009</b>     |
| M1a - SMAproper          | 220.101 | -5.562 | <b>&lt;0.001</b> |
| M1p - PMd                | 224.537 | -5.940 | <b>&lt;0.001</b> |
| M1p - PMv                | 225.813 | -3.907 | <b>&lt;0.001</b> |
| M1p - preSMA             | 225.555 | -5.889 | <b>&lt;0.001</b> |
| M1p - S1                 | 219.392 | -0.338 | 0.793            |
| M1p - SMAproper          | 224.220 | -7.656 | <b>&lt;0.001</b> |
| PMd - PMv                | 216.377 | 2.734  | <b>0.009</b>     |
| PMd - preSMA             | 215.936 | -0.034 | 0.973            |
| PMd - S1                 | 224.451 | 5.680  | <b>&lt;0.001</b> |
| PMd - SMAproper          | 215.865 | -2.481 | <b>0.018</b>     |
| PMv - preSMA             | 216.687 | -2.718 | <b>0.009</b>     |
| PMv - S1                 | 225.637 | 3.602  | <b>&lt;0.001</b> |
| PMv - SMAproper          | 217.165 | -5.110 | <b>&lt;0.001</b> |
| preSMA - S1              | 226.163 | 5.618  | <b>&lt;0.001</b> |
| preSMA - SMAproper       | 216.060 | -2.401 | <b>0.021</b>     |
| S1 - SMAproper           | 224.860 | -7.423 | <b>&lt;0.001</b> |
|                          |         |        |                  |
| <b>Target region: S1</b> |         |        |                  |
| Contrast                 | df      | t      | p                |
| CMA - M1a                | 159.091 | -6.295 | <b>&lt;0.001</b> |
| CMA - M1p                | 161.648 | 1.106  | 0.329            |
| CMA - PMd                | 159.091 | -1.524 | 0.181            |
| CMA - PMv                | 162.728 | 4.727  | <b>&lt;0.001</b> |
| CMA - preSMA             | 165.155 | -1.460 | 0.195            |
| CMA - S1                 | 159.219 | -2.439 | <b>0.030</b>     |
| CMA - SMAproper          | 167.341 | 1.657  | 0.146            |

|                    |         |        |                  |
|--------------------|---------|--------|------------------|
| M1a - M1p          | 161.640 | 6.749  | <b>&lt;0.001</b> |
| M1a - PMd          | 156.256 | 5.139  | <b>&lt;0.001</b> |
| M1a - PMv          | 163.308 | 9.688  | <b>&lt;0.001</b> |
| M1a - preSMA       | 165.550 | 0.834  | 0.421            |
| M1a - S1           | 158.213 | 3.918  | <b>&lt;0.001</b> |
| M1a - SMAproper    | 167.212 | 4.585  | <b>&lt;0.001</b> |
| M1p - PMd          | 161.640 | -2.512 | <b>0.026</b>     |
| M1p - PMv          | 161.840 | 3.549  | <b>0.001</b>     |
| M1p - preSMA       | 165.530 | -1.899 | 0.092            |
| M1p - S1           | 160.123 | -3.333 | <b>0.002</b>     |
| M1p - SMAproper    | 168.020 | 1.031  | 0.345            |
| PMd - PMv          | 163.308 | 6.047  | <b>&lt;0.001</b> |
| PMd - preSMA       | 165.550 | -0.912 | 0.391            |
| PMd - S1           | 158.213 | -1.024 | 0.345            |
| PMd - SMAproper    | 167.212 | 2.384  | <b>0.032</b>     |
| PMv - preSMA       | 164.898 | -3.634 | <b>0.001</b>     |
| PMv - S1           | 162.710 | -6.696 | <b>&lt;0.001</b> |
| PMv - SMAproper    | 165.839 | -1.180 | 0.305            |
| preSMA - S1        | 165.312 | 0.548  | 0.584            |
| preSMA - SMAproper | 165.525 | 2.301  | <b>0.037</b>     |
| S1 - SMAproper     | 167.353 | 2.817  | <b>0.012</b>     |
